# Supplementary material for: Simple synthesis of novel terthiophene-based D–A1–D–A2 polymers for polymer solar cells
Source: Royal Society of Chemistry journal article supplement (doi:10.1039/c6ra18464b), 2016-01-01
Supplement: c6ra18464b1.pdf [file c6ra18464b1.pdf]

## Supporting Information

Simple synthesis of novel terthiophene-based D-A1-D-A2 polymers for  
polymer solar cells

Mengxia Lu, Wen Wang\*, Wei Lv, Shuhui Yan, Tao Zhang, Hongyu Zhen, Qidan  
Ling\*

*Fujian Key Laboratory of Polymer Materials, College of Materials Science and Engineering,  
College of Chemistry and Chemical Engineering, Fujian Normal University, Fuzhou 350007,  
China. E-mail: qdling@fjnu.edu.cn; wangwen@fjnu.edu.cn; Fax: +8605913465225; Tel:  
+86059183465225*

## 1. Synthesis of monomers and polymers

All reagents and starting materials were purchased from commercial sources. 2,5-bis(2-octyldodecyl)-3,6-di(thiophen-2-yl)pyrrolo[3,4-c]pyrrole-1,4 (2H,5H)-dione (T-DPP-T, purity: >98%), and 1,3-dibromo-5-octyl-4H-thieno[3,4-c]pyrrole-4,6 (5H)-dione (5, purity: >98%) was purchased from Derthon. 4,7-dibromo-5,6-difluorobenzo[c][1,2,5]thiadiazole (4, purity: >98%) was purchased from Suna Tech Inc. Benzo[c][1,2,5]thiadiazole (2, purity: >97%) was purchased from Sinopharm Chemical Reagent Co. Ltd. All reagents were put to use without further purification. The solvent must be corresponding treatment with distillation in order to being in the free-water and free-oxygen conditions.

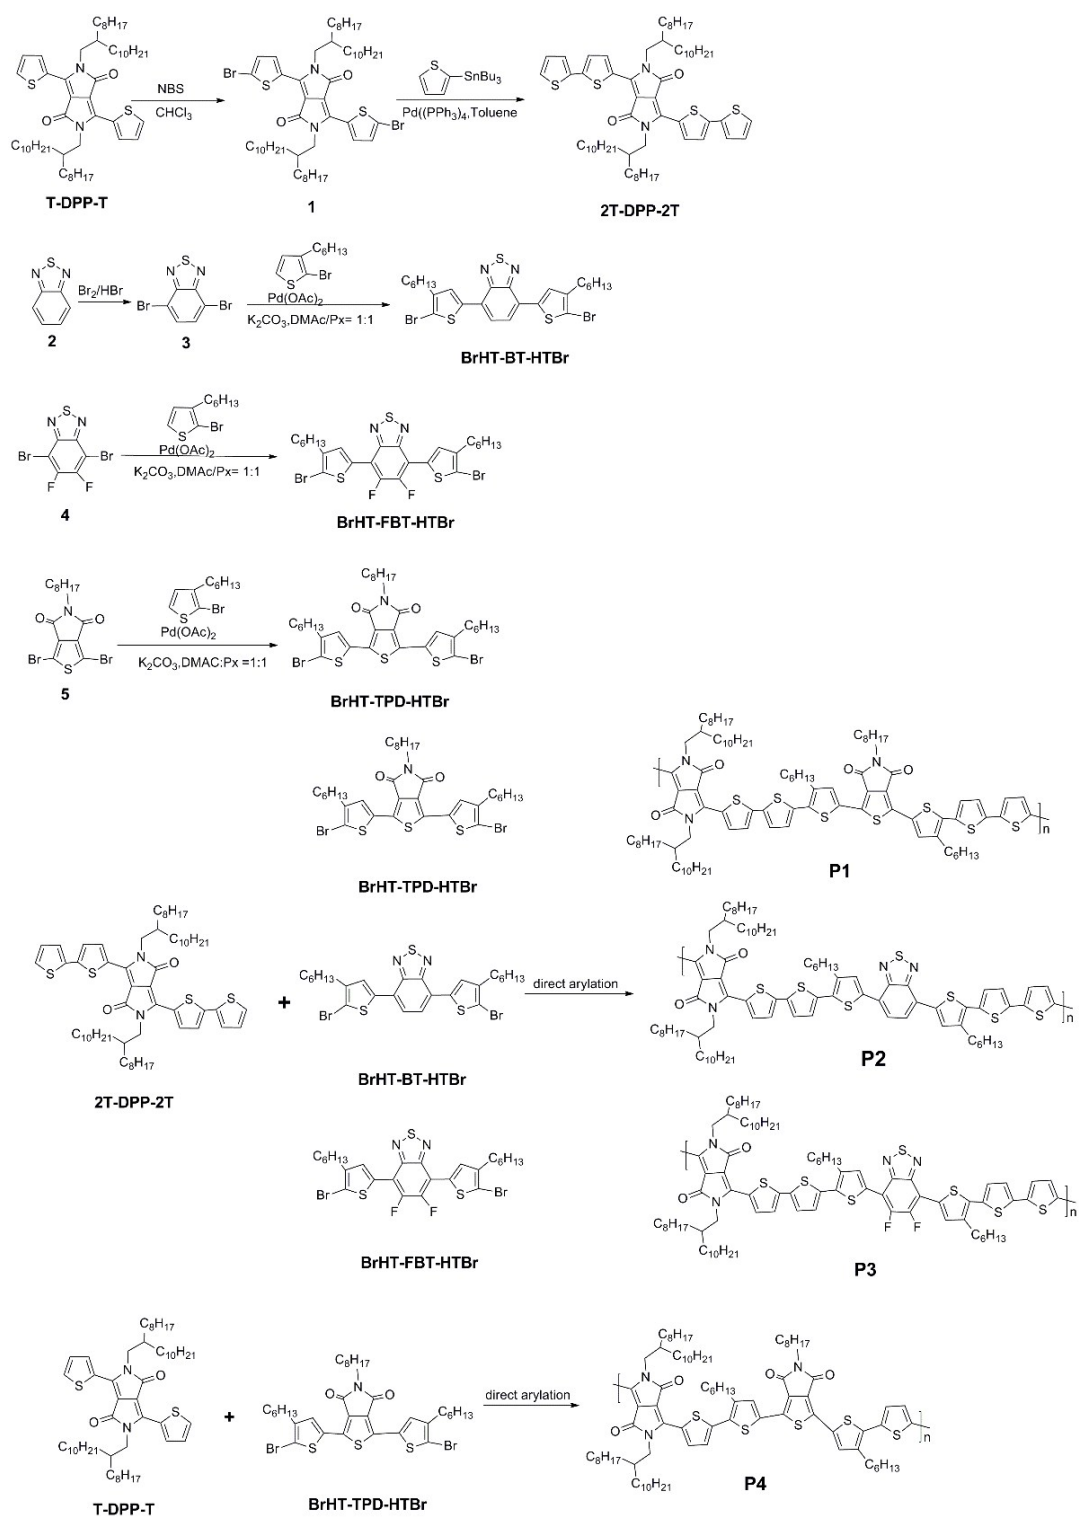

Sc

## heme S1 Synthetic routes of the monomers and polymers

### 1.1 The synthesis of monomers

*3,6-bis(5-bromothiophen-2-yl)-2,5-bis(2-octyldodecyl)pyrrolo[3,4-c]pyrrole-1,4(2H,5H)-dione(1)*

The monomer **T-DPP-T** (0.5 g, 0.58 mmol) and N-Bromosuccinimide (0.26 g, 1.45 mmol) was transferred to a 50mL single-neck bottle in which the mixed solution of CHCl<sub>3</sub> (20 mL) in darkness. The mixture was stirred 24 hours at room temperature. The reaction mixture was poured into water, and the product was extracted with dichloromethane. The organic layer was washed several times with water and dried over MgSO<sub>4</sub>, and the solvent was removed by rotary evaporation. Recrystallization from methanol afforded desired products as purplish red crystals (0.51 g, yield 87.1%). <sup>1</sup>H NMR (400 MHz, CDCl<sub>3</sub>) δ 8.62 (d, 2H), 7.22 (d, 2H), 3.93 (d, 4H), 1.88 (s, 2H), 1.54 (s, 4H), 1.29-1.22 (m, 60H), 0.87 (q, 12H). <sup>13</sup>C NMR (101 MHz, CDCl<sub>3</sub>) δ 161.41, 139.41, 135.30, 131.43, 131.18, 118.95, 108.03, 46.36, 37.77, 31.93, 31.89, 31.19, 29.98, 29.64, 29.56, 29.50, 29.36, 29.29, 26.19, 22.69, 22.67, 14.12. ESI-MS (m/z):  $M_{\text{calcd}}=1018.5$ ,  $M_{\text{found}}=1018.3$ .

*3,6-di([2,2'-bithiophen]-5-yl)-2,5-bis(2-octyldodecyl)pyrrolo[3,4-c]pyrrole-1,4(2H,5H)-dione(2T-DPP-2T)*

The compound **1** (0.5 g, 0.49 mmol) and catalyst (Pd(PPh<sub>3</sub>)<sub>4</sub>, 5 mol%) were transferred to a 25mL single-neck round-bottom flask. And the mixture was degassed for 20 min. Then 2-tributylstannyl-thiophene(0.46 g, 1.23 mmol) was added. Dry toluene which was degassed with argon for 20 min was added. The flask equipped with a condenser was then degassed and filled with argon three times. The reaction mixture was refluxed at 100 °C for 24 h under nitrogen. After cooling down to room temperature, the reaction mixture was poured into water, and the product was extracted with dichloromethane. The solvent was removed, and 0.41 g purple red solid was obtained in 81% yield by silica gel column chromatography (1:3 dichloromethane/ petroleum ether as eluent, R<sub>f</sub> = 0.3). <sup>1</sup>H NMR (400 MHz, CDCl<sub>3</sub>): δ 8.90 (d, 2H), 7.37 (m, 6H), 7.11 (dd, 2H), 4.04 (m, 4H), 1.92 (m, 2H), 1.31 (m, 16H), 0.89 (m, 12H). <sup>13</sup>C NMR (101 MHz, CDCl<sub>3</sub>) δ 161.49, 142.67, 139.45, 136.56, 136.26, 128.16, 126.20, 125.11, 124.76, 108.28, 46.33, 37.94, 31.90, 31.36, 30.06, 29.65, 29.30, 26.37, 22.68, 14.10. ESI-MS (m/z):  $M_{\text{calcd}}=1024.6$ ,  $M_{\text{found}}=1024.1$ .

*4,7-dibromobenzo[c][1,2,5]thiadiazole (3)*

Benzothiadiazole (0.5 g, 0.37 mmol) and HBr (48%) (2 mL) were transferred to

single-neck bottle, and the mixture of bromine (1.6 g, 10 mmol) and HBr (3 mL) was slowly added. After refluxing at 100 °C for 6 h, an orange solid precipitated was formed. After cooling to room temperature, the mixture was washed with saturated NaHCO<sub>3</sub> and was filtered. The solid was washed with cold diethyl ether and 0.91 g pale yellow acicular crystal was obtained in 84.3% yield after recrystallization from methanol. <sup>1</sup>H NMR (400 MHz, CDCl<sub>3</sub>): δ 8.08 (s, 2H).

*4,7-bis(5-bromo-4-hexylthiophen-2-yl)benzo[c][1,2,5]thiadiazole(BrHT-BT-HTBr)*

The compound **3** (0.66 g, 2.24 mmol), 2-bromo-3-hexylthiophene (1.16 g, 4.68 mmol), catalyst Pd(OAc)<sub>2</sub> (5 mol%), tricyclohexylphosphonium tetrafluoroborate (10 mol%), K<sub>2</sub>CO<sub>3</sub> (0.32 g, 2.34 mmol) and pivalic acid (0.18 g, 1.17 mmol) were transferred to single-neck bottle under an atmosphere of nitrogen. DMAc (8 mL) and p-xylene (8 mL) were added and the mixture was refluxed at 110 °C for 48 h. After cooling to room temperature, the solvent was removed, and 0.37 g yellow solid was obtained in 26.1% yield by silica gel column chromatography (1:3 dichloromethane/petroleum ether as eluent, R<sub>f</sub> = 0.5). <sup>1</sup>H NMR (400 MHz, CDCl<sub>3</sub>): δ 7.89 (d, 2H), 6.76 (s, 2H), 2.26 (m, 4H), 1.29-1.59 (m, 16H), 0.88 (m, 6H). <sup>13</sup>C NMR (101 MHz, CDCl<sub>3</sub>) δ 152.01, 143.06, 138.34, 128.05, 125.05, 124.76, 111.35, 31.66, 29.75, 28.99, 22.63, 14.11. ESI-MS (m/z): M<sub>calcd</sub> = 625.99, M<sub>found</sub> = 626.69.

*4,7-bis(5-bromo-4-hexylthiophen-2-yl)-5,6-difluorobenzo[c][1,2,5]thiadiazole(BrHT-FBT-HTBr)*

The compound **4** (0.5 g, 1.52 mmol), 2-bromo-3-hexylthiophene (0.75 g, 3.04 mmol), catalyst Pd(OAc)<sub>2</sub> (5 mol%), tricyclohexylphosphonium tetrafluoroborate (10 mol%), K<sub>2</sub>CO<sub>3</sub> (0.52 g, 3.79 mmol) and pivalic acid (0.24 g, 1.52 mmol) were transferred to single-neck bottle under an atmosphere of nitrogen. DMAc (8 mL) and p-xylene (8 mL) were added and the mixture was refluxed at 110 °C for 48 h. After cooling to room temperature, the solvent was removed, and 0.25 g yellow solid was obtained in 25.2% yield by silica gel column chromatography (1:5 dichloromethane/petroleum ether as eluent, R<sub>f</sub> = 0.7). <sup>1</sup>H NMR (400 MHz, CDCl<sub>3</sub>): δ 6.76 (s, 2H), 2.26(m, 4 H), 1.29-1.59(m, 16 H), 0.88 (m, 6H). <sup>13</sup>C NMR (101 MHz, CDCl<sub>3</sub>) δ 152.01, 143.06, 138.34, 128.05, 125.05, 124.76, 111.35, 31.66, 29.75, 28.99, 22.63,

14.11. ESI-MS (m/z):  $M_{\text{calcd}}=661.97$ ,  $M_{\text{found}}=662.51$ .

*1,3-bis(5-bromo-4-hexylthiophen-2-yl)-5-octyl-4H-thieno[3,4-c]pyrrole-4,6(5H)-dione(BrHT-TPD-HTBr)*

The compound 5 (0.55 g, 1.30 mmol), 2-bromo-3-hexylthiophene (0.64 mg, 2.60 mmol), catalyst  $\text{Pd}(\text{OAc})_2$  (5 mol%), tricyclohexylphosphonium tetrafluoroborate (10 mol%),  $\text{K}_2\text{CO}_3$  (0.36 g, 2.60 mmol) and pivalic acid (0.13 g, 1.30 mmol) were transferred to single-neck bottle under an atmosphere of nitrogen. DMAc (8 mL) and p-xylene (8 mL) were added and the mixture was refluxed at 110 °C for 48 h. After cooling to room temperature, the solvent was removed, and 0.30 g orange-yellow solid was obtained in 30 % yield by silica gel column chromatography (1:5 dichloromethane/ petroleum ether as eluent,  $R_f = 0.5$ ).  $^1\text{H}$  NMR (400 MHz,  $\text{CDCl}_3$ )  $\delta$  7.76 (d, 2H), 3.42 (d, 2H), 2.62 (d, 4H), 1.59-0.88 (m, 37H).  $^{13}\text{C}$  NMR (101 MHz,  $\text{CDCl}_3$ )  $\delta$  162.47, 143.75, 135.51, 131.87, 130.28, 128.37, 113.52, 38.69, 31.78, 31.57, 29.62, 29.53, 29.16, 28.91, 28.50, 26.98, 22.61, 14.07. ESI-MS (m/z):  $M_{\text{calcd}}=755.10$ ,  $M_{\text{found}}=757.04$ .

## 1.2 $^1\text{H}$ NMR and $^{13}\text{C}$ NMR spectra of the monomers and polymers

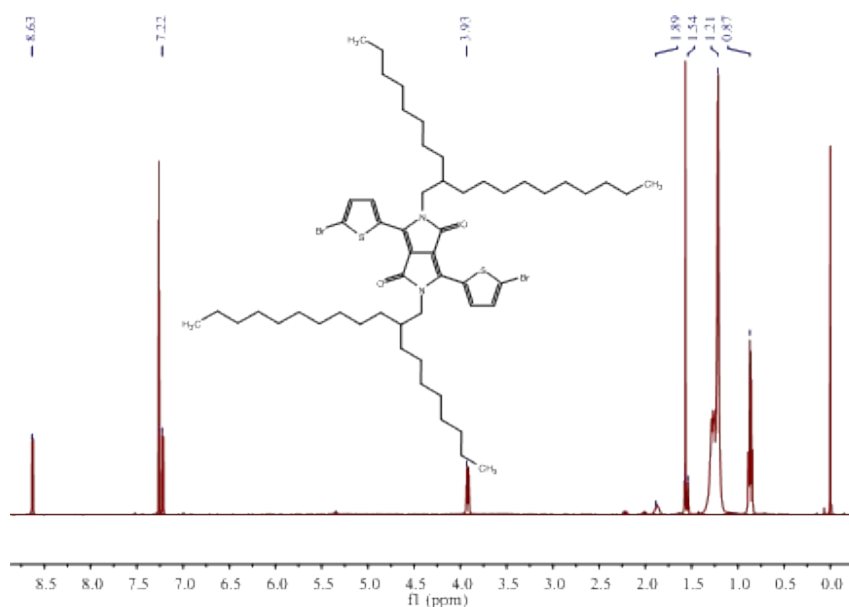

Fig. S1  $^1\text{H}$  NMR spectra of monomer 1

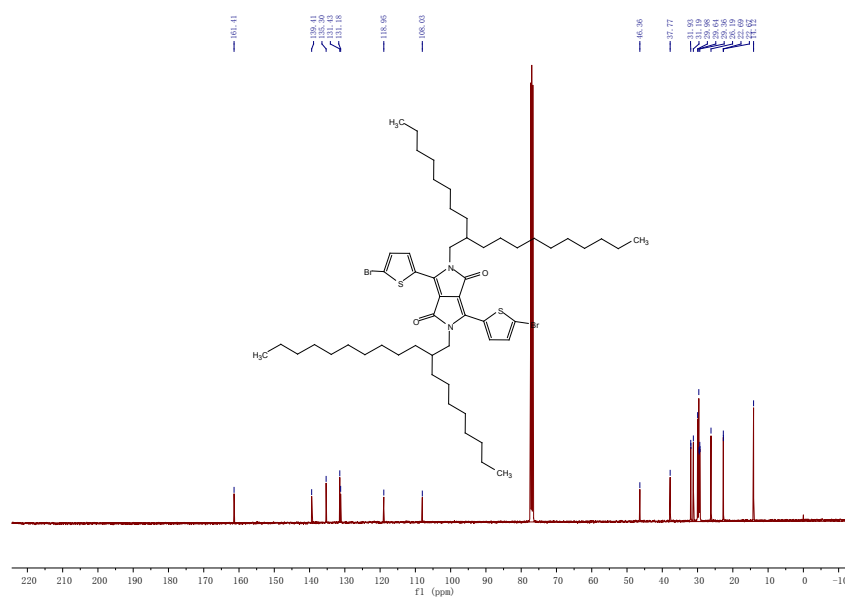

Fig. S2  $^{13}\text{C}$  NMR spectra of monomer 1

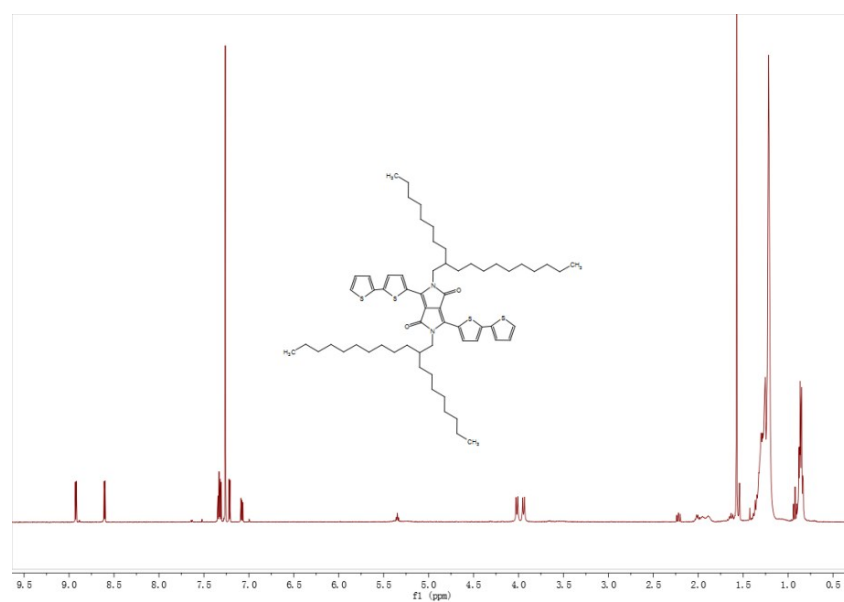

Fig. S3  $^1\text{H}$  NMR spectra of monomer 2T-DPP-2T

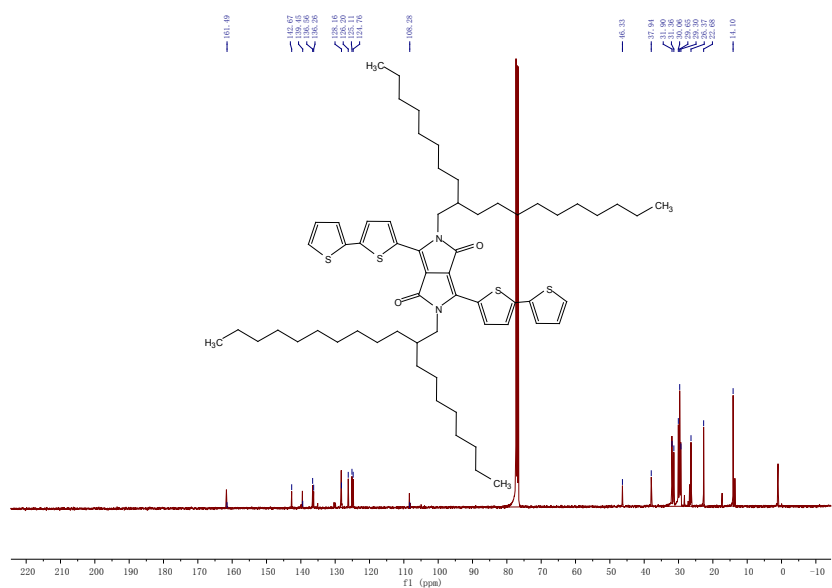

Fig. S4  $^{13}\text{C}$  NMR spectra of monomer 2T-DPP-2T

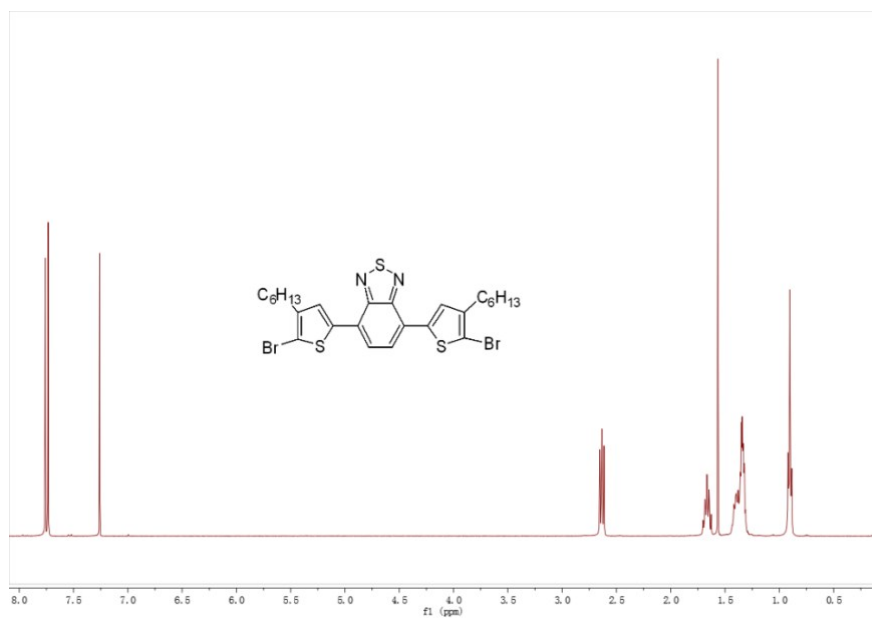

Fig. S5  $^1\text{H}$  NMR spectra of monomer BrHT-BT-HTBr



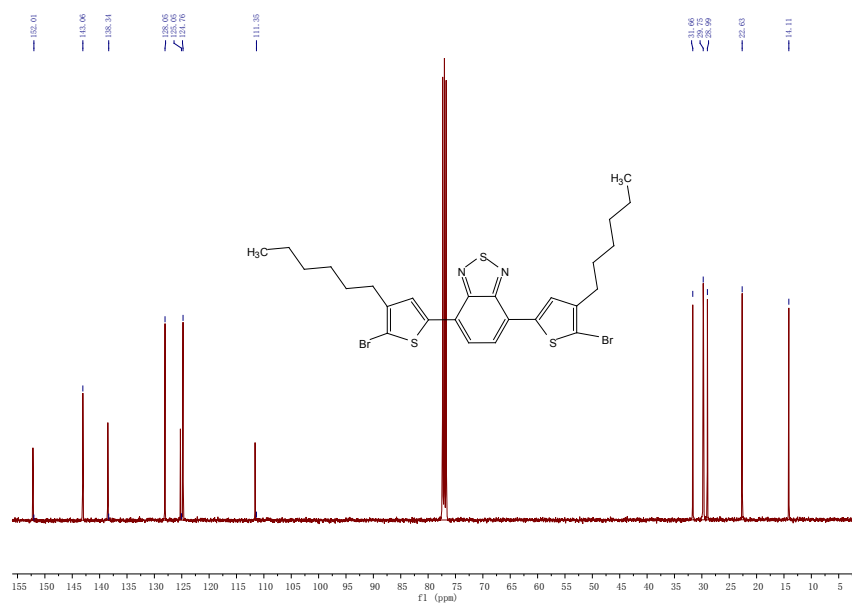

Fig. S6  $^{13}\text{C}$  NMR spectra of monomer BrHT-BT-HTBr

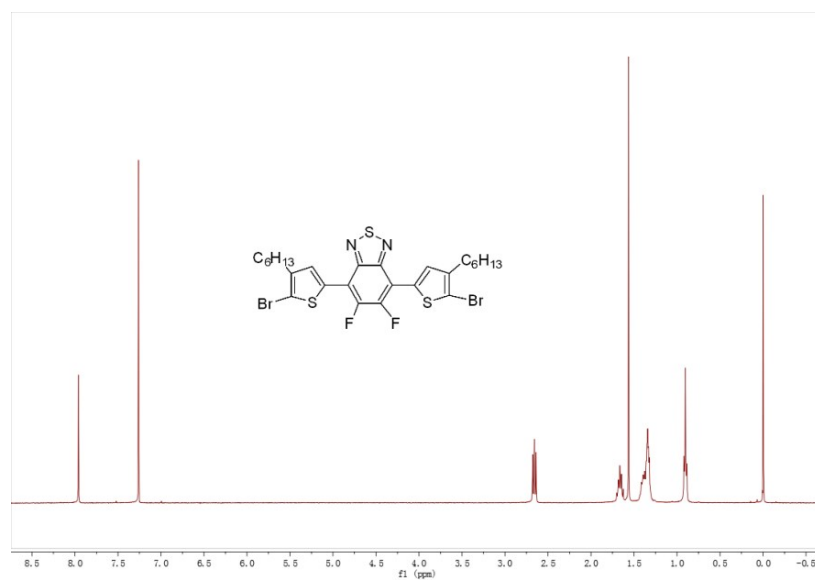

Fig. S7  $^1\text{H}$  NMR spectra of monomer BrHT-FBT-HTBr

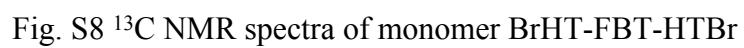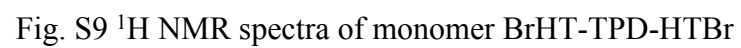

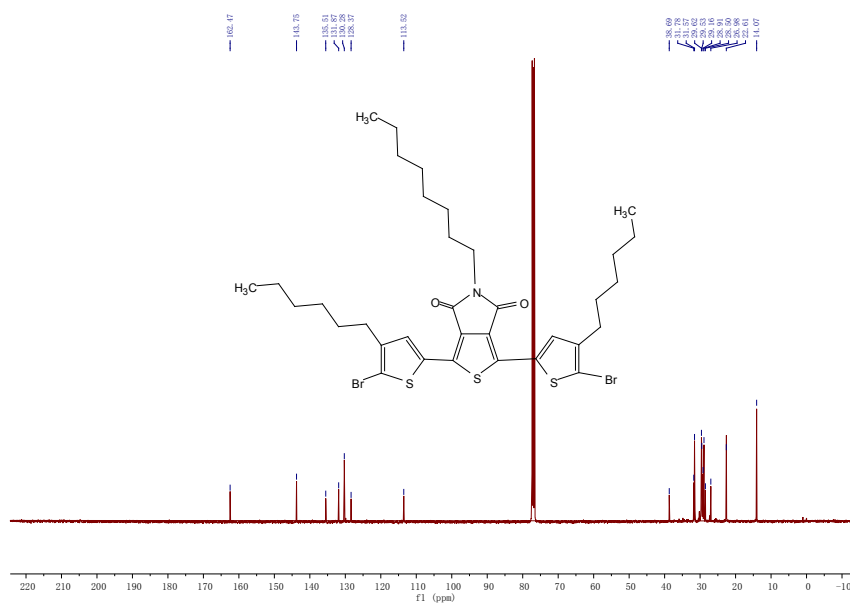

Fig. S10  $^{13}\text{C}$  NMR spectra of monomer BrHT-TPD-HTBr

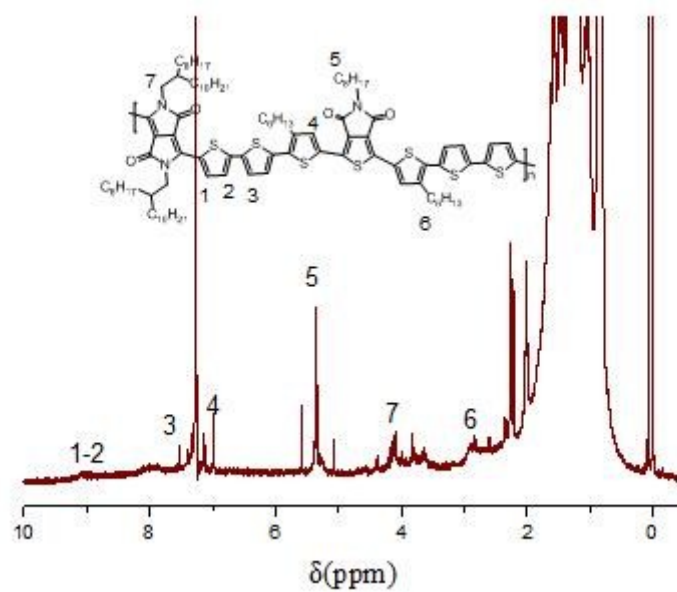

Fig. S11  $^1\text{H}$  NMR spectra of polymer P1

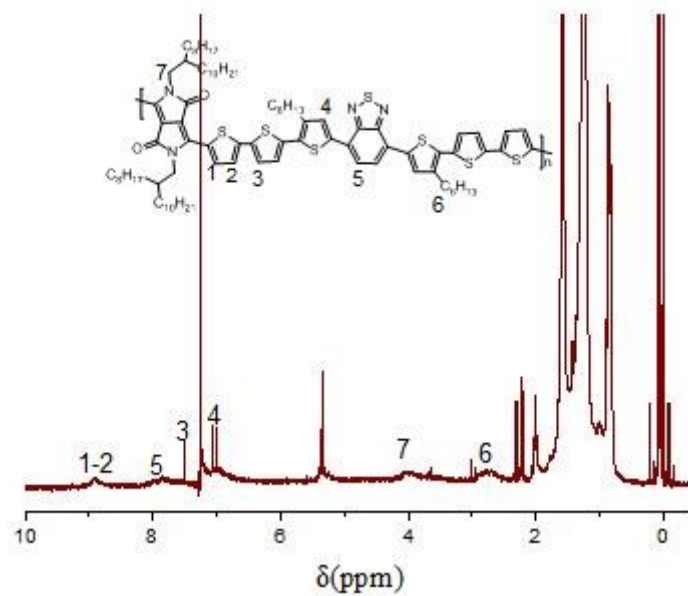

Fig. S12  $^1\text{H}$  NMR spectra of polymer P2

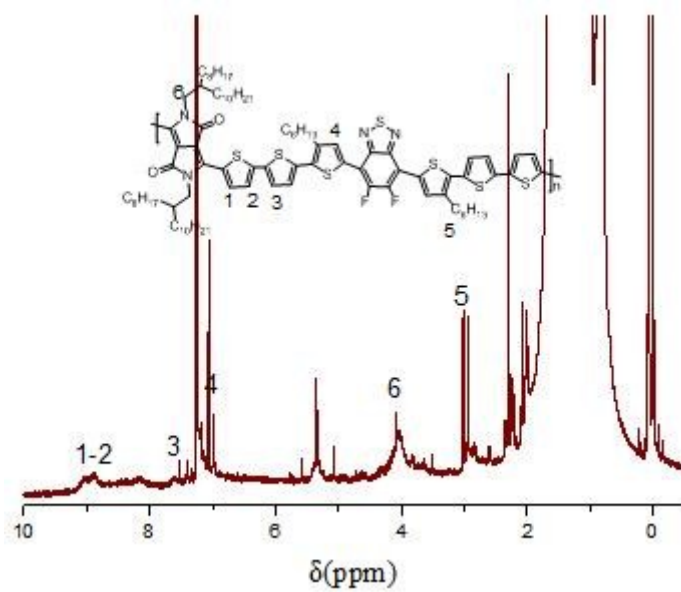

Fig. S13  $^1\text{H}$  NMR spectra of polymer P3

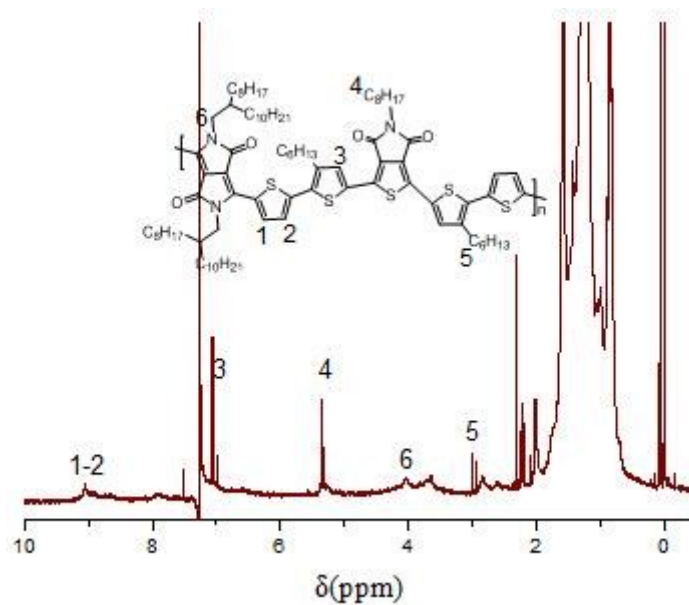

Fig. S14  $^1\text{H}$  NMR spectra of polymer P4

Table. S1 the optimization condition of PSCs based on polymer:  $\text{PC}_{71}\text{BM}$

| Polymer | D/A<br>ratio | Speed<br>$\text{r min}^{-1}$ | Concentration<br>$\text{mg/mL}$ | DIO<br>Vol % | solvent    |
|---------|--------------|------------------------------|---------------------------------|--------------|------------|
| P1      | 1:2          | 1500                         | 4                               | 3            | chloroform |
| P2      | 1:1.5        | 1800                         | 5                               | 3            | chloroform |
| P3      | 1:2          | 1000                         | 5                               | 3            | chloroform |
| P4      | 1:2          | 4300                         | 7                               | 2            | chloroform |

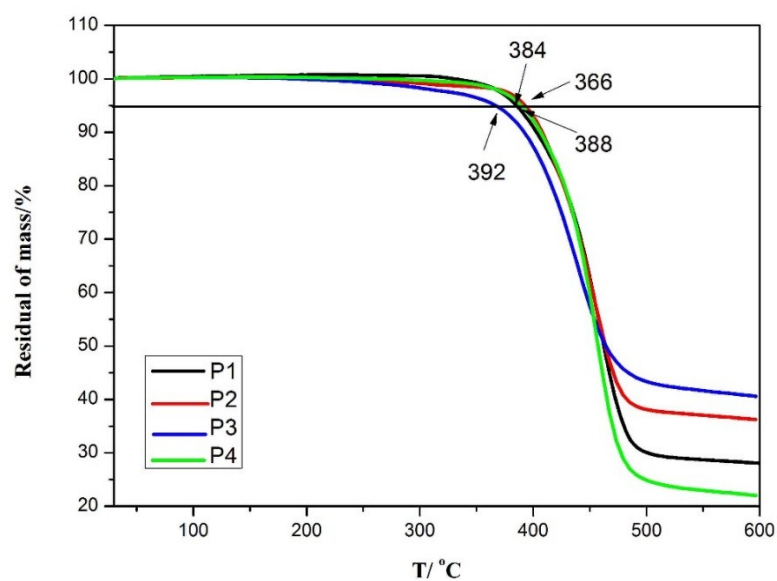

Fig. S15 TGA curves of P1, P2, P3 and P4

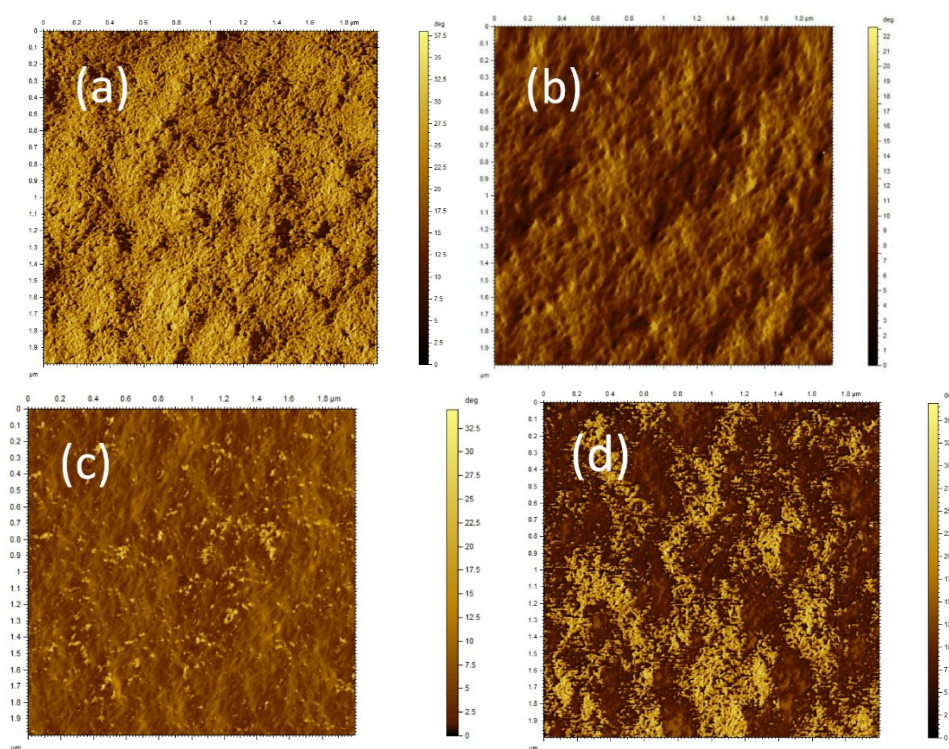

Fig. S16 AFM phase images of polymers : PC<sub>71</sub>BM blend films: P1 (a), P2 (b), P3 (c) and P4(d).
